# Supplementary material for: Digital Transformation and Disruption of the Health Care Sector: Internet-Based Observational Study
Source: PubMed Central journal article supplement (PMC5893888; doi:10.2196/jmir.9498), 2018-03-27
Supplement: jmir_v20i3e104_app1.pdf [file jmir_v20i3e104_app1.pdf]

| Start-up Comp. (with rank in Cbinsights Digital Health Deals) | Activities                                                                   |
|---------------------------------------------------------------|------------------------------------------------------------------------------|
| Fitbit                                                        | <a href="http://www.fitbit.com">www.fitbit.com</a>                           |
| Ability Network                                               | <a href="http://www.abilitynetwork.com">www.abilitynetwork.com</a>           |
| Privia Health                                                 | <a href="http://www.priviahealth.com">www.priviahealth.com</a>               |
| Oscar Health Insurence                                        | <a href="http://www.hioscar.com">www.hioscar.com</a>                         |
| Guahao Technology                                             | <a href="http://www.guahao.com">www.guahao.com</a>                           |
| Change Healthcare                                             | <a href="http://www.changehealthcare.com">www.changehealthcare.com</a>       |
| Jawbone                                                       | <a href="http://www.jawbone.com">www.jawbone.com</a>                         |
| Veeva systems                                                 | <a href="http://www.veeva.com">www.veeva.com</a>                             |
| Netsmart Technologies                                         | <a href="http://www.ntst.com">www.ntst.com</a>                               |
| NantHealth                                                    | <a href="http://www.nanthhealth.com">www.nanthhealth.com</a>                 |
| Evotent Health                                                | <a href="http://www.evotenthealth.com">www.evotenthealth.com</a>             |
| Spring Rain Software                                          | <a href="#">Link to explanation</a>                                          |
| Castlight Health                                              | <a href="http://www.castlighthealth.com">www.castlighthealth.com</a>         |
| Flatiron Health                                               | <a href="http://www.flatiron.com">www.flatiron.com</a>                       |
| Clover Health                                                 | <a href="http://www.cloverhealth.com">www.cloverhealth.com</a>               |
| TelaDoc                                                       | <a href="http://www.teladoc.com">www.teladoc.com</a>                         |
| DedalusThe Gym Group                                          | <a href="http://www.thegymgroup.com">www.thegymgroup.com</a>                 |
| ZocDoc                                                        | <a href="http://www.zocdoc.com">www.zocdoc.com</a>                           |
| Flatiron Health                                               | <a href="http://www.flatiron.com">www.flatiron.com</a>                       |
| Alignment Healthcare                                          | <a href="http://www.alignmenthealthcare.com">www.alignmenthealthcare.com</a> |
| In Vitae                                                      | <a href="http://www.invitae.com">www.invitae.com</a>                         |
| Proteus Digital Helath                                        | <a href="http://www.proteus.com">www.proteus.com</a>                         |
| XIFIN                                                         | <a href="http://www.xifin.com">www.xifin.com</a>                             |
| 23 and me                                                     | <a href="http://www.23andme.com">www.23andme.com</a>                         |
| Butterfly Network                                             | <a href="http://www.butterflynetinc.com">www.butterflynetinc.com</a>         |
| Helix                                                         | <a href="http://www.helix.com">www.helix.com</a>                             |
| Guahao Technology                                             | <a href="http://www.guahao.com">www.guahao.com</a>                           |
| Nantomics                                                     | <a href="http://www.nantomics.com">www.nantomics.com</a>                     |
| Evotent Health                                                | <a href="http://www.evotenthealth.com">www.evotenthealth.com</a>             |
| Healthline Media                                              | <a href="http://www.healthline.com">www.healthline.com</a>                   |
| Antenna79                                                     | <a href="http://www.antenna79.com">www.antenna79.com</a>                     |
| Virgin Pulse                                                  | <a href="http://www.virginpulse.com">www.virginpulse.com</a>                 |
| Crossover Health                                              | <a href="http://www.crossoverhealth.com">www.crossoverhealth.com</a>         |
| Care.com                                                      | <a href="http://www.care.com">www.care.com</a>                               |
| Everbridge                                                    | <a href="http://www.everbridge.com">www.everbridge.com</a>                   |
| Drugstore.com                                                 | <a href="http://www.drugstore.com">www.drugstore.com</a>                     |
| Practo Technologies                                           | <a href="http://www.practo.com">www.practo.com</a>                           |
| Medidata Solutions                                            | <a href="http://www.mdsol.com">www.mdsol.com</a>                             |
| Clover Health                                                 | <a href="http://www.cloverhealth.com">www.cloverhealth.com</a>               |
| Epocrates                                                     | <a href="http://www.epocrates.com">www.epocrates.com</a>                     |
| American Well                                                 | <a href="http://www.americanwell.com">www.americanwell.com</a>               |
| Collective Health                                             | <a href="http://www.collectivehealth.com">www.collectivehealth.com</a>       |
| Bright Health                                                 | <a href="http://www.brighthealthplan.com">www.brighthealthplan.com</a>       |

|                     |                                                                                 |
|---------------------|---------------------------------------------------------------------------------|
| Homecare Homebase   | <a href="http://www.hchb.com">www.hchb.com</a>                                  |
| Peloton Interactive | <a href="http://www.pelotoncycle.com">www.pelotoncycle.com</a>                  |
| ZocDoc              | <a href="http://www.zocdoc.com">www.zocdoc.com</a>                              |
| Imprivata           | <a href="http://www.imprivata.com">www.imprivata.com</a>                        |
| Practice Fusion     | <a href="http://www.practicefusion.com/">www.practicefusion.com/</a>            |
| Heath Catalyst      | <a href="http://www.healthcatalyst.com">www.healthcatalyst.com</a>              |
| One Medical Group   | <a href="http://www.onemedical.com">www.onemedical.com</a>                      |
| HeartFlow           | <a href="http://www.heartflow.com">www.heartflow.com</a>                        |
| Cariomems           | <a href="http://www.cardiomems.com">www.cardiomems.com</a>                      |
| Castlight Health    | <a href="http://www.castlighthealth.com">www.castlighthealth.com</a>            |
| Clearcare           | <a href="http://www.clearcareonline.com">www.clearcareonline.com</a>            |
| PlanetRX            | <a href="http://www.planetrx.com">www.planetrx.com</a>                          |
| Maestro Health Tech | <a href="http://www.maestrohealth.com">www.maestrohealth.com</a>                |
| Dexcom              | <a href="http://www.dexcom.com">www.dexcom.com</a>                              |
| Medsite             | <a href="http://www.medsite.com">www.medsite.com</a>                            |
| Kareo               | <a href="http://www.kareo.com">www.kareo.com</a>                                |
| Accolade            | <a href="http://www.accolade.com">www.accolade.com</a>                          |
| Trubine             | <a href="http://www.turbine.ai/">www.turbine.ai/</a>                            |
| Vitalsmith          | <a href="http://www.vitalsmith.com">www.vitalsmith.com</a>                      |
| Xbird               | <a href="http://www.xbird.io">www.xbird.io</a>                                  |
| Medikeep            | <a href="http://www.medikeep.eu/">www.medikeep.eu/</a>                          |
| Sendinaden          | <a href="http://www.sendinaden.com/">www.sendinaden.com/</a>                    |
| Vitameter           | <a href="http://www.vitameter.org">www.vitameter.org</a>                        |
| Viomedo             | <a href="http://www.viomedo.de">www.viomedo.de</a>                              |
| Cortrium            | <a href="http://www.cortrium.com">www.cortrium.com</a>                          |
| Fibricheck          | <a href="http://www.fibricheck.com">www.fibricheck.com</a>                      |
| Parica              | <a href="http://www.parica.eu/">www.parica.eu/</a>                              |
| Pager               | <a href="http://www.pager.com">www.pager.com</a>                                |
| Hometeamcare        | <a href="http://www.hometeamcare.com">www.hometeamcare.com</a>                  |
| Medwand             | <a href="http://www.medwand.com">www.medwand.com</a>                            |
| Welldoc             | <a href="http://www.welldoc.com">www.welldoc.com</a>                            |
| Rewalk              | <a href="http://www.rewalk.com/de/">www.rewalk.com/de/</a>                      |
| Telesofia           | <a href="http://www.telesofia.org">www.telesofia.org</a>                        |
| Surgical Theater    | <a href="http://www.surgicaltheater.net/">www.surgicaltheater.net/</a>          |
| Totally Pregnant    | <a href="http://www.iamtotally.com">www.iamtotally.com</a>                      |
| Patient know best   | <a href="http://www.patientsknowbest.com">www.patientsknowbest.com</a>          |
| iCouch              | <a href="https://pro.icouch.me/">https://pro.icouch.me/</a>                     |
| Adheretech          | <a href="http://www.adheretech.com/">www.adheretech.com/</a>                    |
| Biovotion           | <a href="http://www.biovotion.com/">http://www.biovotion.com/</a>               |
| Infraredx           | <a href="http://www.infraredx.com/">http://www.infraredx.com/</a>               |
| iRythmtech          | <a href="http://www.irythmtech.com/">http://www.irythmtech.com/</a>             |
| Acutusmedical       | <a href="https://acutusmedical.com/">https://acutusmedical.com/</a>             |
| Silk Road Medical   | <a href="http://silkroadmed.com/">http://silkroadmed.com/</a>                   |
| Cardiokinetix       | <a href="http://www.cardiokinetix.com/de/">http://www.cardiokinetix.com/de/</a> |
| Cvrx                | <a href="http://www.cvrx.com/">http://www.cvrx.com/</a>                         |
| Ebr Systems         | <a href="http://www.ebrsystemsinc.com/">http://www.ebrsystemsinc.com/</a>       |

|                                                   |                                                                                                                                                                                                            |
|---------------------------------------------------|------------------------------------------------------------------------------------------------------------------------------------------------------------------------------------------------------------|
| Cardiofocus                                       | <a href="http://www.cardiofocus.com/">http://www.cardiofocus.com/</a>                                                                                                                                      |
| Vytron                                            | <a href="http://www.vytronus.com/">http://www.vytronus.com/</a>                                                                                                                                            |
| Jenavalve                                         | <a href="http://www.jenavalve.de/">http://www.jenavalve.de/</a>                                                                                                                                            |
| Mitralign                                         | <a href="http://www.mitralign.com/">http://www.mitralign.com/</a>                                                                                                                                          |
| Direct flow medical                               | <a href="http://directflowmedical.com/">http://directflowmedical.com/</a>                                                                                                                                  |
| Cardiac dimensions                                | <a href="http://www.cardiacdimensions.com">www.cardiacdimensions.com</a>                                                                                                                                   |
| Arstasis                                          | <a href="http://www.arstasis.com/">http://www.arstasis.com/</a>                                                                                                                                            |
| Cardivamedical                                    | <a href="http://www.cardivamedical.com/">http://www.cardivamedical.com/</a>                                                                                                                                |
| Lombard Medical                                   | <a href="http://www.lombardmedical.com/">http://www.lombardmedical.com/</a>                                                                                                                                |
| Cardiovascular Systems                            | <a href="http://www.csi360.com/">http://www.csi360.com/</a>                                                                                                                                                |
| Cellaegis                                         | <a href="http://www.cellaegisdevices.com/">http://www.cellaegisdevices.com/</a>                                                                                                                            |
| <b>Technology Comp. (with rank in Forbes2000)</b> | <b>Activities</b>                                                                                                                                                                                          |
| Apple                                             | <a href="#">Apple Care kit, Platform for Apps</a>                                                                                                                                                          |
| Apple                                             | <a href="#">Apple acquired Glimpse (EMR)</a>                                                                                                                                                               |
| AT&T                                              | Connectivity (e.g. to the cloud, via VPN...)                                                                                                                                                               |
| AT&T                                              | Collaboration with IBM to enhance Watson, a IoT-based platform                                                                                                                                             |
| Verizon                                           | <a href="#">Connectivity (similar to AT&amp;T) as a service</a>                                                                                                                                            |
| Samsung                                           | <a href="#">Platform offering for in-house and at home healthcare provision with a number of devices that resemble Apple to some extend</a>                                                                |
| Microsoft                                         | Solutions around patient engagement (e.g. follow up after in-house stay), better care continuum and care effectiveness                                                                                     |
| Microsoft                                         | Analytical capabilities                                                                                                                                                                                    |
| Microsoft                                         | Microsoft Corp. and TracFone Wireless announced collaboration to bring the benefits of smartphone technology and services to underserved and high-risk population (please enter link from comment by hand) |
| Alphabet                                          | Calico                                                                                                                                                                                                     |
| Alphabet                                          | <a href="#">Baseline Joint Venture</a>                                                                                                                                                                     |
| Alphabet                                          | <a href="#">Novartis contact lens Joint Venture (Diabetes)</a>                                                                                                                                             |
| Alphabet                                          | <a href="#">GSK Joint Venture Galvani Bioelectronics</a>                                                                                                                                                   |
| Alphabet                                          | <a href="#">Sanofi Joint Venture Onduo (Diabetis management platform)</a>                                                                                                                                  |
| Alphabet                                          | <a href="#">J&amp;J Surgical robotics</a>                                                                                                                                                                  |
| Alphabet                                          | <a href="#">Dexcom --&gt; Mini glucose sensor</a>                                                                                                                                                          |
| Alphabet                                          | <a href="#">3M Health Information Systems --&gt; population health measurement technology for managing clinical and financial performance.</a>                                                             |
| Alphabet                                          | <a href="#">Patient Management Ecosystem (e.g. in collaboration with healthcare provider [e.h. Harvard Univ.] &amp; pharmacy)</a>                                                                          |
| Comcast                                           | <a href="#">Similar to AT&amp;T connectivity solutions</a>                                                                                                                                                 |
| IBM                                               | Watson: "The future of health is cognitive" --> Cloud data base combined with semantics focused AI-system                                                                                                  |
| Siemens                                           | Siemens Healthineers work on Hospital IT incl. Decision support systems                                                                                                                                    |
| Siemens                                           | Siemens Healthineers and IBM collaborate on population health measurement technology for managing clinical and financial performance                                                                       |
| Intel                                             | <a href="#">SaaS-solutions e.g. in Oncology</a>                                                                                                                                                            |
| Cisco Systems                                     | <a href="#">Provider for connected health data flow, IoT-tracking, work flow optimazation</a>                                                                                                              |
| GE                                                | E Health Cloud --> largest application ecosystem for the healthcare industry; e.g. EMR: Get Real Health's InstantPHR®                                                                                      |

|                            |                                                                                                                                                                                   |
|----------------------------|-----------------------------------------------------------------------------------------------------------------------------------------------------------------------------------|
| GE                         | <a href="#">GE Healthcare and Mission Health Launch First of a Kind Outcomes-Based Innovation Collaboration</a>                                                                   |
| GE                         | collaboration with Uppsala Bio (Process Optimization in the production of Biopharmaceuticals)                                                                                     |
| Deutsche Telekom           | Hospital information systems                                                                                                                                                      |
| Deutsche Telekom           | Trial connect service                                                                                                                                                             |
| Deutsche Telekom           | eHealth platform                                                                                                                                                                  |
| Deutsche Telekom           | Ambient assisted living (e.g. smart home)                                                                                                                                         |
| Oracle                     | <a href="#">Data warehouse and analytical solutions for healthcare providers</a>                                                                                                  |
| Oracle                     | Clinical trials software solutions                                                                                                                                                |
| Oracle                     | Middleware to collect & analyse data                                                                                                                                              |
| Telefonica                 | Digital Hospital incl. Imaging data warehouse, telehealth, teleadvice, M2M                                                                                                        |
| Telefonica                 | Remote Patient Monitoring                                                                                                                                                         |
| Telefonica                 | Telefonica acquired controlling share in the Brazilian chronic care management provider Axismed                                                                                   |
| Walgreens Boots Alliance   | <a href="#">Alliance with Prime Deal (pharmacy benefit manager)</a>                                                                                                               |
| Walgreens Boots Alliance   | Alliance with OptumRx (pharmacy benefit manager)                                                                                                                                  |
| Walgreens Boots Alliance   | <a href="#">Collaboration with Qualcomm</a>                                                                                                                                       |
| Walgreens Boots Alliance   | Alliance with HealthPrize Technologies (patient engagement platform)                                                                                                              |
| Walgreens Boots Alliance   | <a href="#">Boots MediCity Collaborator in Nottingham/UK</a>                                                                                                                      |
| Medtronic                  | Medtronic and Fitbit                                                                                                                                                              |
| Medtronic                  | Collaboration with IBM Watson                                                                                                                                                     |
| Medtronic                  | <a href="#">Collaboration with Sanofi</a>                                                                                                                                         |
| Medtronic                  | <a href="#">Collaboration with Qualcomm</a>                                                                                                                                       |
| Medtronic                  | <a href="#">Collaboration with Samsung &amp; Glooko around Diabetes Partnerships</a>                                                                                              |
| Medtronic                  | <a href="#">Collaboration with Canary Health</a>                                                                                                                                  |
| Orange                     | <a href="#">Connecting patients and providers, some smaller experiments (Please enter by hand)</a>                                                                                |
| Honeywell                  | Connected health platform                                                                                                                                                         |
| Lookheed Martin            | <a href="#">Healthcare Technology Alliance</a>                                                                                                                                    |
| Express Script             | <a href="#">Cooperation with CWS around value based reimbursement</a>                                                                                                             |
| Express Script             | <a href="#">Digital Care solutions through smart bottles</a>                                                                                                                      |
| UPS                        | Hospital logistics                                                                                                                                                                |
| Time Warner                | Connectivity (broad band cabel)                                                                                                                                                   |
| Hewlett Packard Enterprise | <a href="#">Focus on hardware with limited SaaS</a>                                                                                                                               |
| Qualcomm                   | Medical grade IoT-connectivity                                                                                                                                                    |
| Qualcomm                   | <a href="#">Collaboration with Novartis (Qualcomm Life's 2net™ Platform for wireless data); HF-platform</a>                                                                       |
| Qualcomm                   | <a href="#">Collaboration with Boehringer Ingelheim (smart inhaler)</a>                                                                                                           |
| Qualcomm                   | <a href="#">Chronic diseases management programs</a>                                                                                                                              |
| Qualcomm                   | <a href="#">Collaboration with Cerner</a>                                                                                                                                         |
| Qualcomm                   | <a href="#">Collaboration with Medtronic</a>                                                                                                                                      |
| Alibaba                    | <a href="#">online pharmacy</a>                                                                                                                                                   |
| Hitachi                    | <a href="#">Hardware in the focus with added SaaS-solutions. Furthermore the company seems to prepare itself for ist next step in healtcare (e.g. collaboration with Quiagen)</a> |

|                           |                                                                                                                                                                                                                                                                      |
|---------------------------|----------------------------------------------------------------------------------------------------------------------------------------------------------------------------------------------------------------------------------------------------------------------|
| SAP                       | <a href="#">SAP applies SaaS-concepts that worked in other industries to healthcare</a>                                                                                                                                                                              |
| SAP                       | <a href="#">collaboration with ASCO</a>                                                                                                                                                                                                                              |
| Sony                      | Hardware (e.g. OR video equipment)                                                                                                                                                                                                                                   |
| 3M                        | <a href="#">Hospital IT</a>                                                                                                                                                                                                                                          |
| 3M                        | <a href="#">Collaboration with Verily on population health measurementhealth</a>                                                                                                                                                                                     |
| Tencent Holdings          | Connectivity between care givers                                                                                                                                                                                                                                     |
| BT Group                  | <a href="#">Focus on Connectivity and cloud based IT-solutions with limited activities on leveraging data to keep chronic ill patients out of the hospital</a>                                                                                                       |
| Danaher                   | Umbrella company that holds several life science companies (e.g. Leica)                                                                                                                                                                                              |
| China Unicom              | <a href="#">Several local initiatives offering cloud based services to certain regions and cities</a>                                                                                                                                                                |
| EMC                       | EMR- and other data bases with search capabilities                                                                                                                                                                                                                   |
| EMC                       | collaboration with eHealth-initiative in Saskatchewan                                                                                                                                                                                                                |
| Amazon                    | Amazon Web Services (AWS) provide storage and analytical capabilities for hospitals, pharma & device comp.,                                                                                                                                                          |
| Amazon                    | <a href="#">Collaboration with Philips</a>                                                                                                                                                                                                                           |
| Amazon                    | <a href="#">Collaboration with AHA</a>                                                                                                                                                                                                                               |
| Fresenius                 | Dialysis-care, medications, Helios, Consultancy                                                                                                                                                                                                                      |
| Fresenius                 | <a href="#">Fresenius Ventures to invest in eHealth and other digital endeavours</a>                                                                                                                                                                                 |
| Panasonic                 | <a href="#">Hard- as well as software solutions to connect patients and physicians</a>                                                                                                                                                                               |
| Panasonic                 | <a href="#">Diabetes care business from Bayer</a>                                                                                                                                                                                                                    |
| Schneider Electric        | <a href="#">Healthcare &amp; Hospital technology (e.g. combination of hardware and applicable software)</a>                                                                                                                                                          |
| Telstra                   | Australian telecommunication company focused on Connectivity with patients incl. telehealth                                                                                                                                                                          |
| Thermo Fisher Scientific  | Along the lines of it lab equipment focus recent advances to illumine ("precision medicine moonshot")                                                                                                                                                                |
| Accenture                 | Accenture supports healthcare companies with a number of services that focus on productivity, change management, digital transformation etc.. A number of publication focus on changing business models in the life science sector towards value based reimbursement |
| Ericsson                  | Ericsson eHealth Croatia                                                                                                                                                                                                                                             |
| Ericsson                  | Ericsson Mobile Health Remote Patient Monitoring                                                                                                                                                                                                                     |
| Baidu                     | <a href="#">Baidus AI Medical Assistant</a>                                                                                                                                                                                                                          |
| Nokia                     | Nokia Healthcare                                                                                                                                                                                                                                                     |
| Nokia                     | <a href="#">Nokia Connected Health Withings</a>                                                                                                                                                                                                                      |
| Tata Consultancy Services | <a href="#">TCS Diabetes Readmission Predictive Analytics Model</a>                                                                                                                                                                                                  |
| Tata Consultancy Services | <a href="#">Mad Mantra</a>                                                                                                                                                                                                                                           |
| Cognizant Technology      | Smart Solutions for Government and Public Health Programs                                                                                                                                                                                                            |
| RELX Group                | Elsevier Patient engagment                                                                                                                                                                                                                                           |
| Capgemini                 | Bookplan                                                                                                                                                                                                                                                             |
| Infosys                   | Healthcare                                                                                                                                                                                                                                                           |
| Infosys                   | Patient Relationship Managment Tool                                                                                                                                                                                                                                  |
| Infosys                   | iHealth Analytics                                                                                                                                                                                                                                                    |
| Infosys                   | Pay for Perfomence                                                                                                                                                                                                                                                   |

|                                                          |                                                                         |
|----------------------------------------------------------|-------------------------------------------------------------------------|
| Fujitsu                                                  | Healthcare Solutions                                                    |
| VMware                                                   | <a href="#">CPOE System</a>                                             |
| VMware                                                   | Patient Engagement                                                      |
| VMware                                                   | <a href="#">Value Based Care</a>                                        |
| Wipro                                                    | <a href="#">360 Digital Patient Centricity suite &amp; Other</a>        |
| ZTE                                                      | <a href="#">Healthcare Informatization Solution</a>                     |
| ZTE                                                      | <a href="#">eHealth</a>                                                 |
| ZTE                                                      | <a href="#">Cooperation with City of Düsseldorf</a>                     |
| Adobe Systems                                            | <a href="#">Healthcare</a>                                              |
| Adobe Systems                                            | <a href="#">Boehringer Ingelheim Cooperation</a>                        |
| Lenovo Group                                             | <a href="#">Lenovo Solutions for Health</a>                             |
| Lenovo Group                                             | <a href="#">Patient-ID</a>                                              |
| Quanta Computer                                          | <a href="#">www.quoca.net</a>                                           |
| Quanta Computer                                          | <a href="#">Mobile Dialysis</a>                                         |
| HCL Technologies                                         | Healthcare and Lifescience                                              |
| CGI Group                                                | Community Cae 360                                                       |
| Fiserv                                                   | Health Care Paying System                                               |
| ATOS                                                     | <a href="#">Healthcare Services</a>                                     |
| Salesforce.com                                           | Health Cloud , Collaboration with Merck Darmstadt                       |
| Salesforce.com                                           | Stanley HealthCar, Philips collaboration, Similar to SAP                |
| Symantec                                                 | Healthcare Solutions                                                    |
| Asustek Computer                                         | Healthcare                                                              |
| Motorola Solutions                                       | <a href="#">Communication Solutions</a>                                 |
| Intuit                                                   | <a href="#">Health Patient Portal</a>                                   |
| CA                                                       | <a href="#">Health Care Solutions</a>                                   |
| Check Point Software                                     | Data security                                                           |
| Samsung SDS                                              | <a href="#">Healthcare general</a>                                      |
| Samsung SDS                                              | Smart Patient Engagment                                                 |
| Samsung SDS                                              | Metronic and Samsung                                                    |
| Samsung SDS                                              | <a href="#">Bioepis</a>                                                 |
| Dassault Systemes                                        | <a href="#">Variuos software products</a>                               |
| Juniper Networks                                         | Networks designed for Helathcare                                        |
| Harris                                                   | <a href="#">NantHealth Acquires Harris Healthcare Solutions</a>         |
| Harris                                                   | <a href="#">Cooperation of Harris Health</a>                            |
| Compal Electronics                                       | <a href="#">New big Helathcare Unit</a>                                 |
| Citrix Systems                                           | Hospital Software                                                       |
| VeriSign                                                 | <a href="#">Partnership with MS Healthvault</a>                         |
| VeriSign                                                 | <a href="#">Partnership with Presideo Transitions and Organisations</a> |
| Amdocs                                                   | <a href="#">Remote Monitoring Cloud based Solutions</a>                 |
| Inventec                                                 | <a href="#">Joint venture with Advantec</a>                             |
| Red Hat                                                  | Open Source Software                                                    |
| Autodesk                                                 | <a href="#">Hospital Planning</a>                                       |
| Palo Alto Networks,                                      | Data Safety                                                             |
| <b>Lifescience Comp. (with rank in Frobes Top 2000 )</b> | Activities                                                              |
| Allianz                                                  | Berlin-based insurtech startup distributes Allianz products in Europe.  |

|                    |                                                                                                                                                                |
|--------------------|----------------------------------------------------------------------------------------------------------------------------------------------------------------|
| Allianz            | Insurer Blockchain Initiative (Blockchain Insurance Industry Initiative B3i)                                                                                   |
| Allianz            | Dr. Allianz (Telemedicine)                                                                                                                                     |
| Allianz            | My health app Erstattungsanträge                                                                                                                               |
| AXA Group          | Axa Selbstmanagement Portale                                                                                                                                   |
| AXA Group          | AXA Strategic Ventures leads \$2 mln funding in healthcare app Wellth                                                                                          |
| AXA Group          | The AXA PPP Health Tech & You programme                                                                                                                        |
| Johnson & Johnson  | <a href="#">Cooperation with IBM Watson</a>                                                                                                                    |
| Nestle             | Nestle and Smasung cooperation healath care                                                                                                                    |
| UnitedHealth Group | <a href="#">United scoops up patient engagement platform</a>                                                                                                   |
| UnitedHealth Group | <a href="#">UnitedHealthcare and Konami Develop Innovative Program to Reduce Childhood Obesity with the Launch of "DanceDanceRevolution Classroom Edition"</a> |
| UnitedHealth Group | <a href="#">Patient engagment</a>                                                                                                                              |
| Pfizer             | <a href="#">Patient engagement app</a>                                                                                                                         |
| Pfizer             | <a href="#">Cisco's visualization in Pfizer DD</a>                                                                                                             |
| Pfizer             | <a href="#">Pfizer and IBM Watson</a>                                                                                                                          |
| Novartis           | SibA App for Comlience                                                                                                                                         |
| Novartis           | Aktiv bei Brustkrebs App                                                                                                                                       |
| Novartis           | Novartis Prävention App                                                                                                                                        |
| Novartis           | <a href="#">ViaOpta</a>                                                                                                                                        |
| Novartis           | Qualcom & Novartis                                                                                                                                             |
| Novartis           | <a href="#">Novartis and Proteus for digital trails</a>                                                                                                        |
| Novartis           | <a href="#">Novartis Launches the First Apple Watch App for the Visually Impaired</a>                                                                          |
| Novartis           | <a href="#">Novartis and google Contact Lense</a>                                                                                                              |
| Novartis           | <a href="#">Entresto Pay for Performance</a>                                                                                                                   |
| Metlife            | <a href="#">Metliffe Lumen Lab new Buisness Models</a>                                                                                                         |
| Siemens            | <a href="#">Siemens and IBM Watson (more under tech)</a>                                                                                                       |
| CVS Health         | <a href="#">CVS Health launches five new digital health features, including an Apple Watch app</a>                                                             |
| CVS Health         | <a href="#">CVS Health Introduces New Digital Pharmacy Tools to Help Make Medication Adherence Easier and More Convenient</a>                                  |
| CVS Health         | <a href="#">CVS and IBM Wastson</a>                                                                                                                            |
| Roche              | Roche and Qualcomm Collaborate to Innovate Remote Patient Monitoring                                                                                           |
| Roche              | <a href="#">Innovative Pricing Solutions</a>                                                                                                                   |
| Sanofi             | <a href="#">Sanofi value based pricing</a>                                                                                                                     |
| Sanofi             | <a href="#">Sanofi and google</a>                                                                                                                              |
| Merck              | Merck Pharma and Atena Value Based Care Contract                                                                                                               |
| Bayer              | IBM Watson and Bayer                                                                                                                                           |
| GSK                | <a href="#">Nanologica collaboration with GSK</a>                                                                                                              |
| GSK                | <a href="#">GSK verilly GSK and Verily to establish Galvani Bioelectronics – a new company dedicated to the development of bioelectronic medicines</a>         |
| GSK                | <a href="#">GSK Qualcom</a>                                                                                                                                    |
| GSK                | GSK enters into partnership with Propeller Health to develop digital sensors for inhalers                                                                      |

|                         |                                                                                                                                                                                                                                                                                                                                                                                                    |
|-------------------------|----------------------------------------------------------------------------------------------------------------------------------------------------------------------------------------------------------------------------------------------------------------------------------------------------------------------------------------------------------------------------------------------------|
| GSK                     | <a href="#">Big pharma giant GSK says it is the first company in the arena to use Apple ResearchKit for real-world evidence.</a>                                                                                                                                                                                                                                                                   |
| MunichRE                | HSB acquires Meshify tech startup Cloud-based IoT software connects commercial and industrial equipment                                                                                                                                                                                                                                                                                            |
| Walgreens Boot Alliance | <a href="#">Qualcomm announces new connected health collaboration with Walgreens</a>                                                                                                                                                                                                                                                                                                               |
| Walgreens Boot Alliance | Walgreens Goes Live with Data-Sharing Program for Suppliers Using Demand Signal System from Agentrics and Retail Solutions                                                                                                                                                                                                                                                                         |
| Walgreens Boot Alliance | <a href="#">HealthPrize Technologies' Digital Patient Engagement, Education and Medication Adherence Platform Offered in Collaboration with Walgreens</a>                                                                                                                                                                                                                                          |
| Walgreens Boot Alliance | <a href="#">OptumRx and Walgreens Partner to Improve Consumer Convenience, Cost Savings and Outcomes</a>                                                                                                                                                                                                                                                                                           |
| Walgreens Boot Alliance | Why the Walgreens/Prime Deal Could Transform the PBM Industry                                                                                                                                                                                                                                                                                                                                      |
| Walgreens Boot Alliance | <a href="#">Walgreens Adds Tele dermatology to its Digital Health Platform</a>                                                                                                                                                                                                                                                                                                                     |
| Walgreens Boot Alliance | The Association between Participation in a Community Pharmacy's Digital Health Program and Flu Vaccination Rates                                                                                                                                                                                                                                                                                   |
| Walgreens Boot Alliance | The Association between Use of a Community Pharmacy's Mobile Pill Reminder App and Medication Adherence                                                                                                                                                                                                                                                                                            |
| Gilead Sciences         | <a href="#">Gilead Sciences, Mobiquity make significant healthcare investment in London</a>                                                                                                                                                                                                                                                                                                        |
| Swiss Re                | Series A funding of Biovotion (11 Mio in 2016)                                                                                                                                                                                                                                                                                                                                                     |
| Swiss Re                | <a href="#">Insurance is "probing the water", e.g. organizing a conference on eHealth (http://media.cgd.swissre.com/documents/TransformingHealthcareTelemedicine_ConfReport_Feb2015.pdf)</a>                                                                                                                                                                                                       |
| Medtronic               | Medtronic and Qualcomm Partner To Develop Fully Disposable Professional CGM for Type 2 Diabetes - See more at: <a href="https://diatribe.org/medtronic-and-qualcomm-partner-develop-fully-disposable-professional-cgm-type-2-diabetes#sthash.OrlqG50Q.dpuf">https://diatribe.org/medtronic-and-qualcomm-partner-develop-fully-disposable-professional-cgm-type-2-diabetes#sthash.OrlqG50Q.dpuf</a> |
| Medtronic               | <a href="#">Letter to senate</a>                                                                                                                                                                                                                                                                                                                                                                   |
| Medtronic               | Value-Based Healthcare: A New Approach to Diabetes Care                                                                                                                                                                                                                                                                                                                                            |
| Medtronic               | <a href="#">MEDTRONIC AND HARVARD BUSINESS REVIEW</a>                                                                                                                                                                                                                                                                                                                                              |
| Medtronic               | IBM Watson Health and Medtronic: Where devices, data, and patient engagement meet                                                                                                                                                                                                                                                                                                                  |
| Medtronic               | <a href="#">Medtronic launches connected app for pacemaker patients, but patients can't see the data</a>                                                                                                                                                                                                                                                                                           |
| Medtronic               | <a href="#">Increasing Patient Engagement through Effective Treatment Decision Support</a>                                                                                                                                                                                                                                                                                                         |
| Medtronic               | <a href="#">Medtronic CareLink Network For Cardiac Device Patients</a>                                                                                                                                                                                                                                                                                                                             |
| Amgen                   | <a href="#">Cigna inks results-based deals on pricey Amgen, Sanofi PCSK9 meds</a>                                                                                                                                                                                                                                                                                                                  |
| Amgen                   | <a href="#">Harvard Pilgrim cements risk-based contract for pricey cholesterol drug Repatha</a>                                                                                                                                                                                                                                                                                                    |
| Amgen                   | <a href="#">Amgen uses algorithms to venture into digital healthcar</a>                                                                                                                                                                                                                                                                                                                            |
| Allergan                | <a href="#">Allergan Partners with SonarMD® to Develop Innovative IBS-D Patient Engagement Platform for Better Identification and Care of IBS-D Patients</a>                                                                                                                                                                                                                                       |
| Anthem                  | <a href="#">New Anthem pay-for-performance program gives docs \$3.1M</a>                                                                                                                                                                                                                                                                                                                           |
| Anthem                  | Promoting Value-Based Contracting Arrangements with Eli Lilly                                                                                                                                                                                                                                                                                                                                      |



|                             |                                                                                                                                       |
|-----------------------------|---------------------------------------------------------------------------------------------------------------------------------------|
| Anthem                      | <a href="#">Anthem Blue Cross' \$38 Billion Move From Fee-For-Service Medicine</a>                                                    |
| Anthem                      | Anthem unveils a slew of new digital healthcare tools                                                                                 |
| AbbVie                      | <a href="#">A number of regional digital programs accross Europe</a>                                                                  |
| McKesson                    | <a href="#">McKesson and TriZetto to Integrate ClaimsXten and QNXT Systems</a>                                                        |
| McKesson                    | <a href="#">Equipping Care Managers for Success</a>                                                                                   |
| McKesson                    | <a href="#">Prepping Oncology Practices for Value-Based Reimbursement</a>                                                             |
| McKesson                    | <a href="#">Electronic Health Records and Practice Management Software Solutions</a>                                                  |
| Aetna                       | How Aetna is using big data to improve patient health                                                                                 |
| Aetna                       | <a href="#">Cigna, Aetna enter outcomes-based contract with Novartis for heart drug</a>                                               |
| Aetna                       | Aetna and Apple collaborate on digital health and wellness for employers                                                              |
| Aetna                       | <a href="#">What Aetna's \$37B acquisition of Humana could mean for digital health</a>                                                |
| AstraZeneca                 | <a href="#">AstraZeneca will pay for patients to have a personal digital health coach</a>                                             |
| AstraZeneca                 | <a href="#">Vida Health and AstraZeneca launch new app for post-heart attack recovery</a>                                             |
| AstraZeneca                 | <a href="#">AstraZeneca Drives Innovation with Intel Capital</a>                                                                      |
| AstraZeneca                 | <a href="#">AstraZeneca plans new connected inhaler trial to improve medication adherence in COPD patients</a>                        |
| AstraZeneca                 | How AstraZeneca is Using Digital to Solve Pharma's Biggest Challenges                                                                 |
| AstraZeneca                 | <a href="#">AstraZeneca forms 'smart inhaler' digital health partnership</a>                                                          |
| Cigna                       | <a href="#">Cigna wants more value-based reimbursements for systems treating at-risk patients</a>                                     |
| Cigna                       | <a href="#">Cigna inks results-based deals on pricey Amgen, Sanofi PCSK9 meds</a>                                                     |
| Cigna                       | <a href="#">Cigna bets big on telehealth, Aetna on Apple Watch</a>                                                                    |
| Cigna                       | <a href="#">Cigna launches gamified digital health coaching</a>                                                                       |
| Cigna                       | CIGNA-Merck Outcomes Contract Hailed as 'First Step,' but Some Want More Data                                                         |
| Kroger                      | <a href="#">Kroger plans to buy digital health retailer for \$280M</a>                                                                |
| Abbott                      | <a href="#">Abbott EPD: the first digital marketing only launch in pharma</a>                                                         |
| Teva Pharmaceutical         | <a href="#">Teva Pharmaceuticals and IBM Partner to Build Global e-Health Solutions on the IBM Watson Health Cloud</a>                |
| Teva Pharmaceutical         | <a href="#">Teva and Microchips Biotech Announce Partnership to Enhance Patient Outcomes through Digital Drug Delivery Technology</a> |
| Eli Lilly                   | Patient Engagement App Challenge                                                                                                      |
| Eli Lilly                   | Value-Based Pricing                                                                                                                   |
| Eli Lilly                   | Lilly & Anthem Find Common Ground in Value-Based Pricing                                                                              |
| Fresenius                   | <a href="#">Fresenius and Kaiser Permanente Diabetes</a>                                                                              |
| Hospital Coporation America | <a href="#">HCA invests in cognitive computing technology Digital Reasoning</a>                                                       |
| Hospital Coporation America | <a href="#">HCA invests in Sharecare for new patient engagement offering, innovation lab</a>                                          |
| Thermo Fisher               | <a href="#">Thermo Fisher Scientific expands clinical trial services capabilities with new facility in India</a>                      |
| Cardinal Health             | <a href="#">Cardinal Health acquires TelePharm, a digital health startup aimed at retail pharmacies</a>                               |

|                      |                                                                                                                                                                                                                                                                                                                                                                                                                                                                           |
|----------------------|---------------------------------------------------------------------------------------------------------------------------------------------------------------------------------------------------------------------------------------------------------------------------------------------------------------------------------------------------------------------------------------------------------------------------------------------------------------------------|
| Cardinal Health      | <a href="#">Cardinal Health to Acquire OutcomesMTM</a>                                                                                                                                                                                                                                                                                                                                                                                                                    |
| Cardinal Health      | <a href="#">Cardinal Health To Acquire naviHealth, Leader In Post-Acute Care Management Solutions</a>                                                                                                                                                                                                                                                                                                                                                                     |
| Bristol Myers Squibb | <a href="#">Inovalon Announces Agreement with Bristol-Myers Squibb to Focus on Real World Outcomes &amp; Value-Based Contracting Initiatives</a>                                                                                                                                                                                                                                                                                                                          |
| Air Liquide          | <a href="https://www.airliquide.com/connected-innovation/ehealth-connected-solutions-effective-obstructive-sleep-apnea-treatment">https://www.airliquide.com/connected-innovation/ehealth-connected-solutions-effective-obstructive-sleep-apnea-treatment</a>                                                                                                                                                                                                             |
| Humana               | Humana Partners With Pivotal to Rapidly Deliver Healthcare Solutions                                                                                                                                                                                                                                                                                                                                                                                                      |
| Humana               | Provider Medicare Quality P4P                                                                                                                                                                                                                                                                                                                                                                                                                                             |
| Humana               | <a href="#">Humana Spent \$93M in Quality Payments for Provider Network</a>                                                                                                                                                                                                                                                                                                                                                                                               |
| Humana               | <a href="http://valuebasedcare.humana.com">http://valuebasedcare.humana.com</a>                                                                                                                                                                                                                                                                                                                                                                                           |
| Merck KGaA           | <a href="#">eHealth solution for patients with MS (http://www.presseportal.de/pm/6873/3351175)</a>                                                                                                                                                                                                                                                                                                                                                                        |
| Novo Nordisk         | <a href="#">Novo Nordisk, IBM Watson Health to Create 'Virtual Doctor'</a>                                                                                                                                                                                                                                                                                                                                                                                                |
| Novo Nordisk         | <a href="#">Patient Engagement with Novo Nordisk</a>                                                                                                                                                                                                                                                                                                                                                                                                                      |
| Biogen               | <a href="#">Biogen CEO says the biotech aims to develop wearable and ingestible devices</a>                                                                                                                                                                                                                                                                                                                                                                               |
| Celgene              | <a href="#">Celgene, Novartis back precision medicine analytics startup after recent board addition from CMS</a>                                                                                                                                                                                                                                                                                                                                                          |
| Stryker              | <a href="http://www.prnewswire.com/news-releases/strykers-performance-solutions-announces-jointcoach-engagement-platform-designed-to-educate-and-navigate-patients-through-the-entire-episode-of-joint-replacement-care-300258556.html">http://www.prnewswire.com/news-releases/strykers-performance-solutions-announces-jointcoach-engagement-platform-designed-to-educate-and-navigate-patients-through-the-entire-episode-of-joint-replacement-care-300258556.html</a> |
| Stryker              | <a href="https://www.strykerperformancesolutions.com/solutions/alignment-strategies/transition-to-risk/bundled-payments">https://www.strykerperformancesolutions.com/solutions/alignment-strategies/transition-to-risk/bundled-payments</a>                                                                                                                                                                                                                               |
| Stryker              | <a href="https://www.strykerperformancesolutions.com/articles/stryker-explores-broader-risk-based-contracts">https://www.strykerperformancesolutions.com/articles/stryker-explores-broader-risk-based-contracts</a>                                                                                                                                                                                                                                                       |
| Colgate Palmolive    | <a href="http://investor.colgate.com/releasedetail.cfm?ReleaseID=710979">http://investor.colgate.com/releasedetail.cfm?ReleaseID=710979</a>                                                                                                                                                                                                                                                                                                                               |
| Baxter               | <a href="https://www.sciencedaily.com/releases/2016/06/160621144030.htm">https://www.sciencedaily.com/releases/2016/06/160621144030.htm</a>                                                                                                                                                                                                                                                                                                                               |
| BD                   | <a href="http://marketrealist.com/2016/06/how-becton-dickinson-is-driving-growth-through-collaborations/">http://marketrealist.com/2016/06/how-becton-dickinson-is-driving-growth-through-collaborations/</a>                                                                                                                                                                                                                                                             |
| Astellas Pharma      | <a href="#">Humana and Astellas Form Research Collaboration to Improve Health Care Delivery for Seniors (http://cts.businesswire.com/ct/CT?id=smartlink&amp;url=http://www.humana.com&amp;esheet=50568707&amp;lan=en-US&amp;anchor=Humana+Inc.&amp;index=1&amp;md5=3a9dde39caa650820497a1bc315f92ab)</a>                                                                                                                                                                  |
| Mylan                | <a href="#">Minor patient adherence platform in Canada (http://www.pharmafile.com/news/501512/mylan-launches-digital-adherence-programme-heart-patients)</a>                                                                                                                                                                                                                                                                                                              |
| Mylan                | <a href="#">Minor activities in neurological disorders (http://schar-rat.blogspot.de/2015/06/tim-telehealth-in-mnd-study.html)</a>                                                                                                                                                                                                                                                                                                                                        |
| Otsuka Holding       | <a href="#">Joint venture (Otsuka Digital Health) with IBM in psychiatric disorder (http://www.pmlive.com/blogs/digital_intelligence/archive/2016/june/otsuka_joins_forces_with_ibm_for_watson-based_digital_health_venture_1041155?SQ_DESIGN_NAME=2)</a>                                                                                                                                                                                                                 |
| Otsuka Holding       | <a href="#">Proteus &amp; Otsuka submit first commercial drug with built-in sensor to FDA in 2015 (http://www.mobihealthnews.com/46680/proteus-otsuka-submit-first-commercial-drug-with-built-in-sensor-to-fda)</a>                                                                                                                                                                                                                                                       |
| Daiichi Sanyko       | <a href="#">Telehealth initiative in the US on engaging with patients that have Afib together with Harvard's Center of Connected Health</a>                                                                                                                                                                                                                                                                                                                               |

|                                  |                                                                                                                                                                                                                                                                                                                                                                                                                                                                                                                                                                               |
|----------------------------------|-------------------------------------------------------------------------------------------------------------------------------------------------------------------------------------------------------------------------------------------------------------------------------------------------------------------------------------------------------------------------------------------------------------------------------------------------------------------------------------------------------------------------------------------------------------------------------|
|                                  | <a href="http://connectedhealth.partners.org/news-and-events/media-center/announcements/daiichi-sankyo-mobile-app.aspx">http://connectedhealth.partners.org/news-and-events/media-center/announcements/daiichi-sankyo-mobile-app.aspx</a><br><a href="http://www.mobihealthnews.com/40991/why-partners-and-daiichi-sankyo-partnered-on-an-afib-remote-patient-monitoring-pilot">http://www.mobihealthnews.com/40991/why-partners-and-daiichi-sankyo-partnered-on-an-afib-remote-patient-monitoring-pilot</a>                                                                  |
| Daiichi Sanyko                   | <a href="http://www.pmlive.com/blogs/digital_intelligence/archive/2016/february/daiichi_sankyo_collaborates_on_atrial_fibrillation_resource_for_e-patients_935610">Minor initiative in the UK on engaging with patients that have Afib</a><br><a href="http://www.pmlive.com/blogs/digital_intelligence/archive/2016/february/daiichi_sankyo_collaborates_on_atrial_fibrillation_resource_for_e-patients_935610">http://www.pmlive.com/blogs/digital_intelligence/archive/2016/february/daiichi_sankyo_collaborates_on_atrial_fibrillation_resource_for_e-patients_935610</a> |
| Shire                            | <a href="http://www.mobihealthnews.com/33124/shire-drug-trials-should-be-marketed-as-a-healthcare-service">Minor activities around ehealth enhanced drug trials</a><br><a href="http://www.mobihealthnews.com/33124/shire-drug-trials-should-be-marketed-as-a-healthcare-service">http://www.mobihealthnews.com/33124/shire-drug-trials-should-be-marketed-as-a-healthcare-service</a>                                                                                                                                                                                        |
| Takeda Pharmaceutical            | <a href="http://www.fiercepharma.com/marketing/getting-serious-about-digital-takeda-walks-walk-its-digital-accelerator-model">Company wide initiative (Takeda Digital Accelerator) to explore "digital" technology along their value chain</a><br><a href="http://www.fiercepharma.com/marketing/getting-serious-about-digital-takeda-walks-walk-its-digital-accelerator-model">http://www.fiercepharma.com/marketing/getting-serious-about-digital-takeda-walks-walk-its-digital-accelerator-model</a>                                                                       |
| Baxalta (2015 acquired by Shire) | <a href="http://www.tandfonline.com/doi/pdf/10.1080/14737167.2016.1178066?needAccess=true">2015 publication on a reimbursement-strategy in hemophilia</a><br><a href="http://www.tandfonline.com/doi/pdf/10.1080/14737167.2016.1178066?needAccess=true">http://www.tandfonline.com/doi/pdf/10.1080/14737167.2016.1178066?needAccess=true</a>                                                                                                                                                                                                                                  |
| Reinsurance Group of America     | <a href="http://www.mobihealthnews.com/content/health-risk-assessment-app-maker-roadtohealth-gets-4m-reinsurance-group-america">Minor investment in APP producer (UK) roadtohealth</a><br><a href="http://www.mobihealthnews.com/content/health-risk-assessment-app-maker-roadtohealth-gets-4m-reinsurance-group-america">http://www.mobihealthnews.com/content/health-risk-assessment-app-maker-roadtohealth-gets-4m-reinsurance-group-america</a>                                                                                                                           |
| Reinsurance Group of America     | <a href="http://www.rgare.com/knowledge-center/media/articles/ramifications-of-utility-importance-gains-for-patient-generated-health-data-(pghd)">Interesting position paper on insurance's homepage around Patient Generated Personal Health (PGPH) data</a><br><a href="http://www.rgare.com/knowledge-center/media/articles/ramifications-of-utility-importance-gains-for-patient-generated-health-data-(pghd)">http://www.rgare.com/knowledge-center/media/articles/ramifications-of-utility-importance-gains-for-patient-generated-health-data-(pghd)</a>                |
| Sinopharm Group                  | China National Pharmaceutical Group Corp. (CNPGC) known as Sinopharm is a Chinese state-owned enterprise. The corporation was the indirect major shareholder of publicly traded companies Sinopharm Group. The company appears to engage on different fronts into eHealth but links are difficult to understand (e.g. one project with IBM)                                                                                                                                                                                                                                   |
| Valeant Pharmaceuticals          | <a href="http://www.businessfinancenews.com/28874-valeant-pharmaceuticals-intl-inc-vrx-entering-new-era-of-medical-applications/">App-dev together with IBM for eye surgeons</a><br><a href="http://www.businessfinancenews.com/28874-valeant-pharmaceuticals-intl-inc-vrx-entering-new-era-of-medical-applications/">http://www.businessfinancenews.com/28874-valeant-pharmaceuticals-intl-inc-vrx-entering-new-era-of-medical-applications/</a>                                                                                                                             |
| Valeant Pharmaceuticals          | <a href="http://ashp.org/menu/News/PharmacyNews/NewsArticle.aspx?id=4309">Valeant received neg. press in 2016 for dramatic price increases for single source off-patent CV-drugs</a><br><a href="http://ashp.org/menu/News/PharmacyNews/NewsArticle.aspx?id=4309">http://ashp.org/menu/News/PharmacyNews/NewsArticle.aspx?id=4309</a>                                                                                                                                                                                                                                         |
| Mitsubishi Chemical              | <a href="http://www.mt-pharma.co.jp/e/develop/pipeline/e_pipeline1609.pdf">Mitsubishi Tanabe Pharma</a> ( <a href="http://www.mt-pharma.co.jp/e/develop/pipeline/e_pipeline1609.pdf">http://www.mt-pharma.co.jp/e/develop/pipeline/e_pipeline1609.pdf</a> ) and the <a href="http://www.lsii.co.jp/en/">Lifescience Inst.</a> ( <a href="http://www.lsii.co.jp/en/">http://www.lsii.co.jp/en/</a> ) are main activities in healthcare sector. NO major eHealth initiatives                                                                                                    |
| Insurance Australia Group        | <a href="http://svicenter.com/my-product/iag-australia/">Health insurance that has interests in the digital transformation of its sector</a> ( <a href="http://svicenter.com/my-product/iag-australia/">http://svicenter.com/my-product/iag-australia/</a> ) but no initiatives found in public domain                                                                                                                                                                                                                                                                        |
| DaVita                           | DaVita Inc. is one of the largest kidney care companies in the United States. 2015 a collaboration with Qualcomm ( <a href="https://www.qualcomm.com/news/releases/2015/08/31/qualcomm-life-announces-new-connected-health-collaborations-connect-2015">https://www.qualcomm.com/news/releases/2015/08/31/qualcomm-life-announces-new-connected-health-collaborations-connect-2015</a> ) on chronic care management programs was announced.                                                                                                                                   |
| DaVita                           | <a href="http://www.news-medical.net/news/20141116/DaVita-Kidney-Care-Medtronic-partner-to-better-understand-cardiovascular-health-in-ESRD-patients.aspx">2014: Collaboration with Medtronic to understand CV-morbidity in CKD patients better</a> ( <a href="http://www.news-medical.net/news/20141116/DaVita-Kidney-Care-Medtronic-partner-to-better-understand-cardiovascular-health-in-ESRD-patients.aspx">http://www.news-medical.net/news/20141116/DaVita-Kidney-Care-Medtronic-partner-to-better-understand-cardiovascular-health-in-ESRD-patients.aspx</a> )          |

|                                 |                                                                                                                                                                                                                                                                                                                                                                                                                                                                                                                                                                                                                                                                                                                                                                                                                                                                                               |
|---------------------------------|-----------------------------------------------------------------------------------------------------------------------------------------------------------------------------------------------------------------------------------------------------------------------------------------------------------------------------------------------------------------------------------------------------------------------------------------------------------------------------------------------------------------------------------------------------------------------------------------------------------------------------------------------------------------------------------------------------------------------------------------------------------------------------------------------------------------------------------------------------------------------------------------------|
| DaVita                          | <a href="http://www.4-traders.com/DAVITA-INC-12378/news/Davita-Get-Real-Health-s-New-Partnership-with-VSee-Enhances-Patient-Engagement-with-Real-time-Vide-23473068/">Nov 2016: DaVita partners with Vsee to use video technology to engage with patients in the home setting (http://www.4-traders.com/DAVITA-INC-12378/news/Davita-Get-Real-Health-s-New-Partnership-with-VSee-Enhances-Patient-Engagement-with-Real-time-Vide-23473068/)</a>                                                                                                                                                                                                                                                                                                                                                                                                                                               |
| Beiersdorf                      | <a href="http://uk.fashionnetwork.com/news/Beiersdorf-boosts-collaboration-on-innovation-with-Innoget,727665.html#.WGN2-VXhDIU">N/A (new platform to interact with external R&amp;D-comp. --&gt; Innoget (http://uk.fashionnetwork.com/news/Beiersdorf-boosts-collaboration-on-innovation-with-Innoget,727665.html#.WGN2-VXhDIU))</a>                                                                                                                                                                                                                                                                                                                                                                                                                                                                                                                                                         |
| St Jude Medical                 | <a href="http://media.sjm.com/newsroom/media-kits/heart-failure-hypertension/united-states/default.aspx">Acquired by Abbott in 2016. In HF e.g. CardioMems system launched which faces reimbursement challenges despite being superior to SoC (http://media.sjm.com/newsroom/media-kits/heart-failure-hypertension/united-states/default.aspx)</a> and <a href="http://www.mddionline.com/blog/devicetalk/was-medtronic-right-about-st-jude-medicals-cardiomems">http://www.mddionline.com/blog/devicetalk/was-medtronic-right-about-st-jude-medicals-cardiomems)</a>                                                                                                                                                                                                                                                                                                                         |
| St Jude Medical                 | <a href="http://www.mddionline.com/blog/devicetalk/facing-reimbursement-hurdles-st-jude-seek-cms-national-coverage-1-28-15">http://www.mddionline.com/blog/devicetalk/facing-reimbursement-hurdles-st-jude-seek-cms-national-coverage-1-28-15)</a>                                                                                                                                                                                                                                                                                                                                                                                                                                                                                                                                                                                                                                            |
| LabCorp                         | One of the world largest lab testing companies that acquired Covance (2015) and made advances at another CRO (INC) in 2016. In a recent initiative the companies tries to "cut the middleman out" in it lab-value offerings directed at consumers without physician's interface ( <a href="https://www.ehidc.org/resources/498-labcorp">https://www.ehidc.org/resources/498-labcorp</a> )                                                                                                                                                                                                                                                                                                                                                                                                                                                                                                     |
| LabCorp                         | <a href="http://www.businesswire.com/news/home/20141125005774/en/Vivify-Health-Secures-Funding-Global-Strategic-Partners">2014: Funding for Vivify (http://www.businesswire.com/news/home/20141125005774/en/Vivify-Health-Secures-Funding-Global-Strategic-Partners)</a>                                                                                                                                                                                                                                                                                                                                                                                                                                                                                                                                                                                                                      |
| Universal Health Services, Inc. | <a href="http://www.uhsinc.com/behavioral-health/behavioral-health-integration-solutions/">UHS is one of the largest hospital management companies in the United States.... its subsidiaries 24 inpatient acute care hospitals, 3 free-standing emergency departments and 213 inpatient and 16 outpatient behavioral health care facilities located in 37 states, Washington, D.C., the United Kingdom, Puerto Rico and the U.S. Virgin Islands. &gt;115 telehealth projects ongoing focused on lowering readmissions, cutting unnecessary emergency department use, and improving outcomes and patient satisfaction (http://www.uhsinc.com/behavioral-health/behavioral-health-integration-solutions/)</a>                                                                                                                                                                                   |
| Boston Scientific               | <a href="http://www.bostonscientific.com/en-US/products/remote-patient-monitoring/preventive-bodyguardian.html">US based device company that offers hardware solutions for patient remote monitoring (http://www.bostonscientific.com/en-US/products/remote-patient-monitoring/preventive-bodyguardian.html)</a> and engages in numerous collaborations (incl. Karolinska Hospital) to fully leverage the digital transformation of the healthcare sector ( <a href="http://www.bostonscientific.com/en-US/products/remote-patient-monitoring.html">http://www.bostonscientific.com/en-US/products/remote-patient-monitoring.html</a> ) and ( <a href="http://www.karolinska.se/en/karolinska-university-hospital/Innovation/innovation-partnership/boston-scientific/">http://www.karolinska.se/en/karolinska-university-hospital/Innovation/innovation-partnership/boston-scientific/</a> ) |
| Boston Scientific               | <a href="http://ehealth.eletsonline.com/2015/05/boston-scientific-collaborates-medaxiom-togethermd/">Collaboration with consultancies around value-based care (http://ehealth.eletsonline.com/2015/05/boston-scientific-collaborates-medaxiom-togethermd/)</a> and ( <a href="http://news.bostonscientific.com/2016-01-28-Boston-Scientific-and-Accenture-Develop-Data-Driven-Digital-Health-Solution-to-Help-Improve-Patient-Outcomes-and-Reduce-Cost-of-Treating-Chronic-Cardiovascular-Conditions">http://news.bostonscientific.com/2016-01-28-Boston-Scientific-and-Accenture-Develop-Data-Driven-Digital-Health-Solution-to-Help-Improve-Patient-Outcomes-and-Reduce-Cost-of-Treating-Chronic-Cardiovascular-Conditions</a> )                                                                                                                                                            |
| Boston Scientific               | <a href="http://www.bostonscientific.com/en-EU/advantics.html">Consultancy around ist products with focus on value-based care (http://www.bostonscientific.com/en-EU/advantics.html)</a>                                                                                                                                                                                                                                                                                                                                                                                                                                                                                                                                                                                                                                                                                                      |
| Zimmer Biomet                   | <a href="http://www.mobihealthnews.com/content/zimmer-">Medical device company focused on orthopedic devices...spun off from Bristol-Myers Squibb. Digital activities incl. home based physiotherapy (http://www.mobihealthnews.com/content/zimmer-</a>                                                                                                                                                                                                                                                                                                                                                                                                                                                                                                                                                                                                                                       |

|                           |                                                                                                                                                                                                                                                                                                                                                                                                                                                                                                                                                                                                                                             |
|---------------------------|---------------------------------------------------------------------------------------------------------------------------------------------------------------------------------------------------------------------------------------------------------------------------------------------------------------------------------------------------------------------------------------------------------------------------------------------------------------------------------------------------------------------------------------------------------------------------------------------------------------------------------------------|
|                           | <a href="#">biomet-buys-home-based-physical-therapy-company-respondwell)</a>                                                                                                                                                                                                                                                                                                                                                                                                                                                                                                                                                                |
| Zimmer Biomet             | <a href="#">Value based care in the focus (http://www.prnewswire.com/news-releases/zimmer-biomet-unveils-signature-solutions-300303747.html)</a> focus on • <a href="#">Interactive patient engagement tools for patient education, communication and adherence to protocols</a> • <a href="#">Data mining and analysis platform to collect patient-reported outcomes</a> • <a href="#">Consulting services</a> • <a href="#">Digital health software solutions</a> • <a href="#">Personalized, patient-specific medical technologies and instruments to improve quality and outcomes as well as streamline workflow</a>                    |
| Onex Corporation          | <a href="#">N/A (Onex Corporation is a private equity investment firm and holding company based out of Toronto, Ontario. As of 2016, the firm has over \$22 billion of assets under management. Investments in a number of eHealth companies e.g. http://www.cliniconex.com/2016/10/cliniconex-expands-ottawa-team-armed-with-new-funding-led-by-capital-angel-network-and-wesley-clover/)</a>                                                                                                                                                                                                                                              |
| Henry Schein Inc.         | <a href="#">Henry Schein Inc. is a distributor of health care products and services. Collaboration with digital healthcare solution provider Medpod (http://www.medpodinc.com/)</a>                                                                                                                                                                                                                                                                                                                                                                                                                                                         |
| Henry Schein Inc.         | Partner in the Quality payment program of the US-government with focus on diabetes, beta-blocker use after MI and hypertension ( <a href="https://qpp.cms.gov/">https://qpp.cms.gov/</a> ) and ( <a href="https://www.henryschein.com/us-en/Medical/ResourceCenter/quality-value-based-care.aspx">https://www.henryschein.com/us-en/Medical/ResourceCenter/quality-value-based-care.aspx</a> )                                                                                                                                                                                                                                              |
| Henry Schein Inc.         | <a href="#">Practise management platform (http://dentrix.com/about-us/about-dentrix)</a>                                                                                                                                                                                                                                                                                                                                                                                                                                                                                                                                                    |
| Henry Schein Inc.         | <a href="#">Diabetes management platform (https://www.henryschein.com/us-en/340B/ResourceCenter/comprehensive-diabetes-care.aspx)</a>                                                                                                                                                                                                                                                                                                                                                                                                                                                                                                       |
| Quest Diagnostics         | <a href="#">MedPlus, the healthcare information technology subsidiary of Quest Diagnostics, is a leading developer and integrator of clinical connectivity and healthcare data management solutions (http://ir.questdiagnostics.com/phoenix.zhtml?c=82068&amp;p=irol-newsArticle)</a>                                                                                                                                                                                                                                                                                                                                                       |
| Quest Diagnostics         | <a href="#">Contrary to LabCorp Quest aims at the physician segment with its online platforms (http://itelemedicine.com/news/virtual-diagnostic-testing/)</a>                                                                                                                                                                                                                                                                                                                                                                                                                                                                               |
| Quest Diagnostics         | <a href="#">Collaboration with IBM-Watson to offer lab/genetic and analytical capabilities to physicians (http://www.mobihealthnews.com/content/ibm-teams-quest-diagnostics-precision-medicine-service-and-7-more-digital-health-deals)</a>                                                                                                                                                                                                                                                                                                                                                                                                 |
| Centene                   | <a href="#">Centene Corporation is a leading multi-line healthcare enterprise that contracts with government healthcare programs, healthcare and commercial organizations to provide specialty services, including behavioral healthcare services through Cenpatico, care management software, correctional systems healthcare, in-home health services, life and health management, vision, pharmacy benefits management, specialty pharmacy and telehealth services (e.g. http://www.centene.com/programs/connections-plus/).</a>                                                                                                         |
| Regeneron Pharmaceuticals | Biotechnology company originally focused on neurotrophic factors and regenerative capabilities it branched out into cytokines and tyrosine kinase receptor inh. Several initiatives with Mt. Sinai, Mayo and Geisinger to analyse genomic data sets ( <a href="https://www.genomeweb.com/sequencing/regeneron-launches-100k-patient-genomics-study-geisinger-forms-new-genetics-cent?utm_source=TrendMD&amp;utm_medium=TrendMD&amp;utm_campaign=1">https://www.genomeweb.com/sequencing/regeneron-launches-100k-patient-genomics-study-geisinger-forms-new-genetics-cent?utm_source=TrendMD&amp;utm_medium=TrendMD&amp;utm_campaign=1</a> ) |

|                                       |                                                                                                                                                                                                                                                                                                                                                                                                                                                                                                                                                                                                                                     |
|---------------------------------------|-------------------------------------------------------------------------------------------------------------------------------------------------------------------------------------------------------------------------------------------------------------------------------------------------------------------------------------------------------------------------------------------------------------------------------------------------------------------------------------------------------------------------------------------------------------------------------------------------------------------------------------|
| Sun Pharma Industries                 | Sun Pharmaceutical Industries is an Indian multinational pharmaceutical company that manufactures and sells pharmaceutical formulations and active pharmaceutical ingredients (APIs) primarily in India and the United States. Collaboration with gomohealth, a digital patient engagement company ( <a href="https://gomohealth.com/">https://gomohealth.com/</a> )                                                                                                                                                                                                                                                                |
| Rite Aid (soon Walgreens (see above)) | <a href="http://www.drugstorenews.com/article/walgreens-telehealth-expansion-other-pilots-shed-light-pharmacy%E2%80%99s-changing-role">Rite Aid is the largest drugstore chain on the East Coast and the third largest in the U.S.. 2015 Walgreens offered &gt;17 billion US \$ to acquire it. Initiative to directly address patients through Mdlive (<a href="http://www.drugstorenews.com/article/walgreens-telehealth-expansion-other-pilots-shed-light-pharmacy%E2%80%99s-changing-role">http://www.drugstorenews.com/article/walgreens-telehealth-expansion-other-pilots-shed-light-pharmacy%E2%80%99s-changing-role</a>)</a> |
| Community Health Systems              | Community Health Systems Inc. is the largest provider of general hospital healthcare services in the United States. It cooperates with America Well on Telehealth services ( <a href="https://www.americanwell.com/the-top-5-reasons-health-systems-like-chs-are-adopting-telehealth/">https://www.americanwell.com/the-top-5-reasons-health-systems-like-chs-are-adopting-telehealth/</a> )                                                                                                                                                                                                                                        |
| Tenet Healthcare                      | <a href="http://www.healthcareitnews.com/news/tenet-subsiidiary-acquires-rcm-developer">Tenet Healthcare Corporation is a multinational investor-owned healthcare services that operates hospitals and acute care facilities (mainly in US). Its subsidiary Conifer Health Solutions offers digital solutions to hospitals and practices (<a href="http://www.healthcareitnews.com/news/tenet-subsiidiary-acquires-rcm-developer">http://www.healthcareitnews.com/news/tenet-subsiidiary-acquires-rcm-developer</a>) and (<a href="http://coniferhealth.com/">http://coniferhealth.com/</a>)</a>                                    |
| Intuitive Surgical                    | <a href="http://www.intouchhealth.com/">Intuitive produces surgical robotic solutions. Collaboration with intouch-telehealth provider (<a href="http://www.intouchhealth.com/">http://www.intouchhealth.com/</a>) to Jointly Develop Patient Informatics Network and Cloud-based Operating Room Data Solutions</a>                                                                                                                                                                                                                                                                                                                  |
