# Supplementary material for: Digital Transformation and Disruption of the Health Care Sector: Internet-Based Observational Study
Source: PubMed Central journal article supplement (PMC5893888; doi:10.2196/jmir.9498), 2018-03-27
Supplement: jmir_v20i3e104_app2.pdf [file jmir_v20i3e104_app2.pdf]

| Rank | Name                   | Customer value proposition given 0 (not given) - 4 (fully visible) | Mean of Key Resources, Key Processes and Profit formula can be identified | Total Mean | Comment                                                                                                                     | Classification | Targets            | Located                                  |
|------|------------------------|--------------------------------------------------------------------|---------------------------------------------------------------------------|------------|-----------------------------------------------------------------------------------------------------------------------------|----------------|--------------------|------------------------------------------|
| 1a   | Proteus Digital Health | 3,67                                                               | 3,00                                                                      | 3,33       | Proteus Discover want to increase adherence via an ingestible sensor, sensor patch, mobile application and a provider porta | Device         | Adherence          | Redwood City, California, United States  |
| 2a   | Jawbone                | 3,43                                                               | 2,95                                                                      | 3,19       | Fitness Tracker                                                                                                             | Device         | Lifestyle          | San Francisco, California, United States |
| 3a   | Fitbit                 | 3,29                                                               | 2,90                                                                      | 3,10       | Fitness Tracker                                                                                                             | Device         | Lifestyle          | San Francisco, California, United States |
| 4a   | Dexcom                 | 3,33                                                               | 2,78                                                                      | 3,06       | Continuous glucose monitoring via mobile application                                                                        | Device         | Adherence          | San Diego, California, United States     |
| 5a   | iRhythmtech            | 3,29                                                               | 2,52                                                                      | 2,90       | Cardiac arrhythmic monitor via a sensor patch and cloud based analytics                                                     | Device         | Diagnostic         | San Francisco, California, United States |
| 6a   | Telesofia Medical      | 3,20                                                               | 2,53                                                                      | 2,87       | Patient engagement and management platform                                                                                  | Platform       | Patient engagement | Tel Aviv, Tel Aviv, Israel               |
| 7a   | Privia Health          | 3,00                                                               | 2,29                                                                      | 2,64       | Platform to connect patients and doctors                                                                                    | Platform       | Patient engagement | Arlington, Virginia, United States       |
| 8a   | Vitalsmith             | 2,67                                                               | 2,61                                                                      | 2,64       | Ovulation testing via saliva and smartphone device                                                                          | Service        | Lifestyle          | Gangneung, Kangwondo, South Korea        |
| 9a   | Adheretech             | 3,00                                                               | 2,24                                                                      | 2,62       | Wireless pill bottles to increase adherence                                                                                 | Device         | Adherence          | New York, New York, United States        |
| 10a  | Oscar Health Insurance | 2,71                                                               | 2,48                                                                      | 2,60       | Technology-centered insurance provider                                                                                      | Service        | Prevention         | New York, New York, United States        |

|     |                  |      |      |      |                                                                                                       |          |                    |                                          |
|-----|------------------|------|------|------|-------------------------------------------------------------------------------------------------------|----------|--------------------|------------------------------------------|
| 11a | American Well    | 3,00 | 2,17 | 2,58 | Telehealth technology to improve access to affordable care                                            | Platform | Patient engagement | Boston, Massachusetts, United States     |
| 12a | Virgin Pulse     | 2,83 | 2,28 | 2,56 | Develops technologies to improve employees engagement through healthier lifestyle                     | Software | Prevention         | Framingham, Massachusetts, United States |
| 13a | Crossover Health | 2,83 | 2,22 | 2,53 | App for simplifying appointments for health services                                                  | Platform | Lifestyle          | Aliso Viejo, California, United States   |
| 14a | Cardiomems       | 2,50 | 2,56 | 2,53 | Heart failure management system                                                                       | Device   | Diagnostic         | Atlanta, Georgia, United States          |
| 15a | Fibrichck        | 2,67 | 2,33 | 2,50 | App to monitor your heart rhythm via smartphone                                                       | Software | Diagnostic         | Hasselt, Limburg, Belgium                |
| 16a | 23 and me        | 2,50 | 2,44 | 2,47 | Genetic testing to prevent diseases via kit that is mailed back from home                             | Service  | Diagnostic         | Mountain View, California, United States |
| 17a | The Gym Group    | 2,50 | 2,39 | 2,44 | Gym provider with more flexible offers all over the country and a new way to exercise                 | Service  | Prevention         | Guildford, Surrey, United Kingdom        |
| 18a | Vitameter        | 2,67 | 2,22 | 2,44 | Vitamin testing & dosage via one drop of blood and a technical device                                 | Device   | Lifestyle          | Kitchener, Ontario, Canada               |
| 19a | Mitralign        | 2,60 | 2,27 | 2,43 | Non-surgical mitral valve repair using latest catheter and imaging technology                         | Device   | Treatment          | Tewksbury, Massachusetts, United States  |
| 20a | Xbird            | 2,57 | 2,29 | 2,43 | Use machine learning, big data, sensor analyzing to detect critical health events prior to appearance | Service  | Diagnostic         | Berlin, Berlin, Germany                  |
| 1b  | Medtronic        | 3,50 | 2,67 | 3,08 | Partnership with fitbit to track glucose levels and physical activity data via an app                 | Software | Prevention         | Minneapolis, Minnesota, United States    |
| 2b  | Samsung          | 3,43 | 2,57 | 3,00 | Platform offering for in-house and at home health care provision with a number of devices for seniors | Platform | Prevention         | Suwon, Chung Chongnamdo, South Korea     |
| 3b  | Microsoft        | 3,33 | 2,67 | 3,00 | Health cloud                                                                                          | Platform | Quality            | Redmond,                                 |

|     |           |      |      |      |                                                                                                            |          |                    |                                          |
|-----|-----------|------|------|------|------------------------------------------------------------------------------------------------------------|----------|--------------------|------------------------------------------|
|     |           |      |      |      | information management system                                                                              |          | Management         | Washington, United States                |
| 4b  | Alphabet  | 3,14 | 2,71 | 2,93 | Autofocus contact lens to measure blood glucose levels or for people with farsightedness                   | Device   | Adherence          | Mountain View, California, United States |
| 5b  | Qualcomm  | 3,33 | 2,39 | 2,86 | Wireless tracker for its respite inhalers                                                                  | Device   | Adherence          | San Diego, California, United States     |
| 6b  | Apple     | 3,14 | 2,52 | 2,83 | Apple care kit: platform for Apps                                                                          | Software | Quality Management | Cupertino, California, United States     |
| 7b  | Alphabet  | 3,14 | 2,48 | 2,81 | Partnership with Dexcom to develop smaller and better glucose sensors                                      | Device   | Adherence          | Mountain View, California, United States |
| 8b  | Medtronic | 3,17 | 2,28 | 2,72 | Partnership with Sanofi with focus on developing devices and care-management services for chronic diseases | Device   | Adherence          | Minneapolis, Minnesota, United States    |
| 9b  | Microsoft | 3,00 | 2,44 | 2,72 | Microsoft Cloud solutions to improve patient outcomes, lower costs, and increase efficiency                | Software | Patient engagement | Redmond, Washington, United States       |
| 10b | Alphabet  | 3,00 | 2,22 | 2,61 | Verily brings together technology and life sciences to explore new ways in health and diseases             | Software | Quality Management | Mountain View, California, United States |
| 11b | AT&T      | 2,86 | 2,33 | 2,60 | Connectivity provider to track and monitor patients to improve outcome                                     | Platform | Quality Management | Dallas, Texas, United States             |
| 12b | Qualcomm  | 3,17 | 2,00 | 2,58 | Chronic diseases management programs                                                                       | Platform | Quality Management | San Diego, California, United States     |
| 13b | Medtronic | 3,00 | 2,17 | 2,58 | Aim to Improve care and health outcomes for people with type 2 diabetes                                    | Device   | Adherence          | Minneapolis, Minnesota, United States    |
| 14b | BM        | 2,83 | 2,33 | 2,58 | IBM Watson cloud data base combined with semantics focused AI-system to deliver better health              | Software | Diagnostic         | Armonk, New York, United States          |

|         |                 |      |      |      |                                                                                                                      |          |                    |                                          |
|---------|-----------------|------|------|------|----------------------------------------------------------------------------------------------------------------------|----------|--------------------|------------------------------------------|
| 15<br>b | Alphabet        | 3,14 | 2,00 | 2,57 | Joint Venture with Sanofi to develop diabetes management platform                                                    | Software | Quality Management | Mountain View, California, United States |
| 16<br>b | Alphabet        | 3,00 | 2,11 | 2,56 | Joint Venture with GSK to develop future generation continuous glucose monitoring systems to improve health outcomes | Device   | Adherence          | Mountain View, California, United States |
| 17<br>b | Verizon         | 2,71 | 2,33 | 2,52 | Connectivity provider to transform healthcare                                                                        | Platform | Quality Management | New York, New York, United States        |
| 18<br>b | Qualcomm        | 3,00 | 2,00 | 2,50 | Medical grade Internet of Things-connectivity platform                                                               | Software | Quality Management | San Diego, California, United States     |
| 19<br>b | SAP             | 2,83 | 2,17 | 2,50 | Providing in-memory data platform to improve patient treatment and change cancer care                                | Platform | Quality Management | Walldorf, Baden-Wurtemberg, Germany      |
| 20<br>b | Alphabet        | 2,71 | 2,19 | 2,45 | Partnership with J&J to develop better surgical robotics                                                             | Device   | Treatment          | Mountain View, California, United States |
| 1c      | Novartis        | 3,14 | 2,71 | 2,93 | Deal with payers that heart failure drug Entresto will be paid-for-performance                                       | VBC      | Quality Management | Basel, Basel-Stadt, Switzerland          |
| 2c      | GSK             | 3,40 | 2,33 | 2,87 | Partnership with Propeller Health to develop digital sensors for inhaler to improve adherence and outcome            | Device   | Adherence          | Middlesex, New Jersey, United States     |
| 3c      | Roche           | 3,17 | 2,39 | 2,78 | Partnership with Qualcomm to innovate and improve remote monitoring and management of patients with chronic diseases | Platform | Quality Management | Basel, Basel-Stadt, Switzerland          |
| 4c      | St Jude Medical | 3,00 | 2,53 | 2,77 | Developing innovative solutions for heart failure disease management                                                 | Device   | Treatment          | Saint Paul, Minnesota, United States     |
| 5c      | Sanofi          | 3,17 | 2,33 | 2,75 | Development of                                                                                                       | Device   | Adherence          | Paris, Ile-                              |

|     |                                  |      |      |      |                                                                                                              |          |                    |                                         |
|-----|----------------------------------|------|------|------|--------------------------------------------------------------------------------------------------------------|----------|--------------------|-----------------------------------------|
|     |                                  |      |      |      | diameters devices                                                                                            |          | nce                | de-France, France                       |
| 6c  | Baxalta (2015 acquired by Shire) | 3,20 | 2,27 | 2,73 | Developing innovative outcome based care model for hemophilia management                                     | VBC      | Quality Management | Illinois City, Illinois, United States  |
| 7c  | Merck KGaA                       | 3,40 | 2,00 | 2,70 | Partnership with HAPPYneuron for cognitive training program for multiple sclerosis patients via platforms    | Software | Quality Management | Darmstadt, Hessen, Germany              |
| 8c  | AstraZeneca                      | 3,00 | 2,40 | 2,70 | Connected inhaler trial to improve adherence in chronic obstructive pulmonary disease (COPD) patients        | Device   | Adherence          | London, London, United Kingdom          |
| 9c  | Novartis                         | 3,00 | 2,39 | 2,69 | Created app for visually impaired people to walk by foot                                                     | Software | Treatment          | Basel, Basel-Stadt, Switzerland         |
| 10c | AstraZeneca                      | 3,00 | 2,33 | 2,67 | Partnership with Adherium to develop smart inhaler for patients with asthma                                  | Device   | Adherence          | London, London, United Kingdom          |
| 11c | Teva Pharmaceutical              | 3,00 | 2,28 | 2,64 | Partnership with Microchips Biotech to develop digital drug delivery technology for improved patient outcome | Device   | Treatment          | Tiqva, HaMerkaz, Israel                 |
| 12c | Sanofi                           | 2,83 | 2,44 | 2,64 | Value-based pricing deal with insurer Cigna for new cholesterol drug                                         | VBC      | Quality Management | Paris, Ile-de-France, France            |
| 13c | Walgreens Boot Alliance          | 3,00 | 2,27 | 2,63 | Mobile pill reminder app to increase adherence                                                               | Software | Adherence          | Deerfield, Illinois, United States      |
| 14c | CVS Health                       | 3,00 | 2,27 | 2,63 | Developing digital tools to help customers manage their health in simpler ways                               | Software | Quality Management | Woonsocket, Rhode Island, United States |
| 15c | Merck                            | 3,00 | 2,25 | 2,63 | Value-based deal with Aetna for type 2 diabetes medications (Januvia and Janumet)                            | VBC      | Quality Management | Darmstadt, Hessen, Germany              |
| 16c | Pfizer                           | 3,00 | 2,17 | 2,58 | Developing patient-centered mobile                                                                           | Software | Patient engage     | New York, New York,                     |

|         |                |      |      |      |                                                                                                                               |          |                       |                                                      |
|---------|----------------|------|------|------|-------------------------------------------------------------------------------------------------------------------------------|----------|-----------------------|------------------------------------------------------|
| 17<br>c | Novartis       | 3,00 | 2,17 | 2,58 | health apps<br><br>Partnership with Qualcomm for digital inhaler device to empower patients with COPD to manage their disease | Device   | ment<br><br>Treatment | United States<br><br>Basel, Basel-Stadt, Switzerland |
| 18<br>c | GSK            | 3,00 | 2,06 | 2,53 | Patient-centered research study with use of the iPhone for rheumatoid arthritis, to improve knowledge of the disease          | Software | Quality Management    | Middlesex, New Jersey, United States                 |
| 19<br>c | Daiichi Sanyko | 3,00 | 2,00 | 2,50 | Using telehealth to engage patients with atrial fibrillation                                                                  | Platform | Patient engagement    | Chūō, Tokio, Japan                                   |
| 20<br>c | CVS Health     | 2,83 | 2,17 | 2,50 | Apple Watch app to inform customers when recipes are ready                                                                    | Software | Adherence             | Woonsocket, Rhode Island, United States              |
